# Supplementary material for: Microarray Profiling in Fibrogenesis Imperfecta Ossium
Source: Research Square preprint supplement (doi:10.21203/rs.3.rs-138783/v1), 2021-01-07
Supplement: Supplementary file 2 [file 1f3038faad3d78a0fe2a2200.xlsx]

## Sheet: GO BP
Enrichment FDR	Genes in list	Total genes	Functional Category	Genes
0.0146194	15	2414	Cellular catabolic process	PGK1 FBXL5 SPOP CAT ATG3 PRDX2 ATG4B DDX5 TCIRG1 CSDE1 VIM EIF4G1 CLTA RPS23 RPS9
0.0189455	15	2727	Catabolic process	PGK1 FBXL5 SPOP CAT ATG3 PRDX2 ATG4B DDX5 TCIRG1 CSDE1 VIM EIF4G1 CLTA RPS23 RPS9
0.0345391	15	3112	Negative regulation of metabolic process	YY1 DDX5 EIF4G1 LRRFIP1 EIF4A2 CCDC85B GNAI2 EGR1 PRDX2 SF1 CSDE1 VIM POLR2L RPS23 RPS9
0.0160409	11	1506	Macromolecule catabolic process	FBXL5 SPOP DDX5 TCIRG1 ATG4B CSDE1 VIM EIF4G1 CLTA RPS23 RPS9
0.0160409	10	1252	Cellular macromolecule catabolic process	FBXL5 SPOP DDX5 TCIRG1 CSDE1 VIM EIF4G1 CLTA RPS23 RPS9
0.0146194	9	911	MRNA metabolic process	SRSF3 DDX5 SF1 CSDE1 VIM EIF4G1 POLR2L RPS23 RPS9
0.0146194	8	723	Translation	RPS23 MRPL23 RPS9 EIF4G1 EIF2S2 EIF4A2 VIM MRPL28
0.0146194	8	748	Peptide biosynthetic process	RPS23 MRPL23 RPS9 EIF4G1 EIF2S2 EIF4A2 VIM MRPL28
0.0222795	8	902	Peptide metabolic process	RPS23 MRPL23 RPS9 EIF4G1 EIF2S2 EIF4A2 VIM MRPL28
0.0222795	8	898	Amide biosynthetic process	RPS23 MRPL23 RPS9 EIF4G1 EIF2S2 EIF4A2 VIM MRPL28
0.0168433	7	611	Nucleobase-containing compound catabolic process	PGK1 DDX5 CSDE1 VIM EIF4G1 RPS23 RPS9
0.0222288	7	664	Cellular nitrogen compound catabolic process	PGK1 DDX5 CSDE1 VIM EIF4G1 RPS23 RPS9
0.0222288	7	662	Heterocycle catabolic process	PGK1 DDX5 CSDE1 VIM EIF4G1 RPS23 RPS9
0.0222795	7	676	Aromatic compound catabolic process	PGK1 DDX5 CSDE1 VIM EIF4G1 RPS23 RPS9
0.025901	7	709	Organic cyclic compound catabolic process	PGK1 DDX5 CSDE1 VIM EIF4G1 RPS23 RPS9
0.0146194	6	364	MRNA catabolic process	DDX5 CSDE1 VIM EIF4G1 RPS23 RPS9
0.0148099	6	398	RNA catabolic process	DDX5 CSDE1 VIM EIF4G1 RPS23 RPS9
0.0266892	6	518	Response to peptide	SPARC GNAI2 EGR1 CAT VIM TCIRG1
0.0310481	6	564	Posttranscriptional regulation of gene expression	RPS9 EIF4G1 VIM DDX5 EIF4A2 POLR2L
0.0146194	5	244	Nuclear-transcribed mRNA catabolic process	DDX5 CSDE1 EIF4G1 RPS23 RPS9
0.0146194	5	212	Translational initiation	EIF4G1 EIF2S2 EIF4A2 RPS23 RPS9
0.0275007	4	209	Protein targeting to membrane	SEC63 ATG3 RPS23 RPS9
0.0266892	3	85	Regulation of gene silencing by miRNA	EIF4G1 DDX5 POLR2L
0.0269539	3	88	Regulation of posttranscriptional gene silencing	EIF4G1 DDX5 POLR2L
0.0269539	3	88	Regulation of gene silencing by RNA	EIF4G1 DDX5 POLR2L
0.0353744	3	106	SRP-dependent cotranslational protein targeting to membrane	SEC63 RPS23 RPS9
0.0146194	2	5	Response to L-ascorbic acid	SPARC CAT
0.0269548	2	21	Positive regulation of gene silencing by miRNA	EIF4G1 DDX5
0.0275007	2	22	Positive regulation of posttranscriptional gene silencing	EIF4G1 DDX5
0.0345391	2	26	Response to lead ion	SPARC CAT

## Sheet: GO CC
Enrichment FDR	Genes in list	Total genes	Functional Category	Genes
0.00119015	23	4616	Non-membrane-bounded organelle	RPS23 RPS9 MRPL28 YY1 TPM4 POLR2L MRPL23 AIF1 VIM LIMCH1 DDX5 GNAI2 SAP30BP CCDC85B MYL12A COTL1 CLTA FGD3 TIAL1 WASF2 SF1 EIF4G1 LRRFIP1
0.00119015	23	4616	Intracellular non-membrane-bounded organelle	RPS23 RPS9 MRPL28 YY1 TPM4 POLR2L MRPL23 AIF1 VIM LIMCH1 DDX5 GNAI2 SAP30BP CCDC85B MYL12A COTL1 CLTA FGD3 TIAL1 WASF2 SF1 EIF4G1 LRRFIP1
0.030396	17	4243	Vesicle	VIM MYL12A PGK1 COTL1 DDX5 GNAI2 CAT WASF2 TPM4 PRDX2 CHID1 RPS9 CLTA TMEM123 SPARC TCIRG1 FCGR1A
0.0134875	13	2342	Cytoskeleton	TPM4 AIF1 VIM LIMCH1 GNAI2 SAP30BP CCDC85B MYL12A COTL1 CLTA FGD3 WASF2 LRRFIP1
0.0242338	12	2335	Extracellular organelle	VIM MYL12A PGK1 COTL1 DDX5 GNAI2 CAT WASF2 TPM4 PRDX2 CHID1 RPS9
0.0242338	12	2309	Extracellular exosome	VIM MYL12A PGK1 COTL1 DDX5 GNAI2 CAT WASF2 TPM4 PRDX2 CHID1 RPS9
0.0242338	12	2333	Extracellular vesicle	VIM MYL12A PGK1 COTL1 DDX5 GNAI2 CAT WASF2 TPM4 PRDX2 CHID1 RPS9
0.00496499	9	980	Ribonucleoprotein complex	RPS23 RPS9 MRPL28 MRPL23 VIM DDX5 SF1 TIAL1 EIF4G1
0.030396	9	1542	Catalytic complex	GNAI2 FBXL5 ATG3 POLR2L SDHD YY1 DDX5 PHC1 SPOP
0.001224	6	280	Ribosome	RPS23 RPS9 MRPL28 MRPL23 SF1 EIF4G1
0.00344781	5	220	Ribosomal subunit	RPS23 RPS9 MRPL28 MRPL23 EIF4G1
0.0183223	5	396	Endocytic vesicle	VIM CLTA TCIRG1 SPARC FCGR1A
0.030396	5	515	Actin cytoskeleton	TPM4 AIF1 LIMCH1 MYL12A WASF2
0.0296669	4	304	Ubiquitin ligase complex	FBXL5 ATG3 PHC1 SPOP
0.00496499	3	55	Cytosolic small ribosomal subunit	RPS23 RPS9 EIF4G1
0.00825441	3	72	Polysome	VIM RPS23 EIF4G1
0.0162044	3	98	Small ribosomal subunit	RPS23 RPS9 EIF4G1
0.019821	3	112	Nuclear matrix	SPARC VIM YY1
0.0242338	3	126	Cytosolic ribosome	RPS23 RPS9 EIF4G1
0.0268959	3	141	Nuclear periphery	SPARC VIM YY1
0.0378689	3	177	Ruffle	AIF1 WASF2 FGD3
0.0412637	3	197	Lamellipodium	WASF2 FGD3 AIF1
0.0066414	2	13	Eukaryotic translation initiation factor 4F complex	EIF4G1 EIF4A2
0.0378689	2	58	Organellar large ribosomal subunit	MRPL28 MRPL23
0.0378689	2	60	Stress fiber	LIMCH1 TPM4
0.0378689	2	58	Mitochondrial large ribosomal subunit	MRPL28 MRPL23
0.0378689	2	61	PcG protein complex	YY1 PHC1
0.0378689	2	60	Contractile actin filament bundle	LIMCH1 TPM4
0.0422563	2	67	Actin filament bundle	LIMCH1 TPM4
0.0422705	2	69	Myosin complex	LIMCH1 MYL12A

## Sheet: GO MP
Enrichment FDR	Genes in list	Total genes	Functional Category	Genes
0.0220665	19	4488	Nucleic acid binding	CSDE1 SEC63 MRPL28 DDX5 SRSF3 EIF4G1 EIF2S2 TIAL1 EIF4A2 SF1 RPS23 RPS9 YY1 VIM EGR1 LRRFIP1 PHC1 POLR2L MRPL23
0.0479845	17	4505	Metal ion binding	SPARC POLR2L AIF1 FBXL5 EGR1 LIMCH1 RSBN1 YY1 MYL12A PHC1 GNAI2 CAT EIF2S2 FGD3 TPM4 SF1 SDHD
5.47101e-05	16	1842	RNA binding	CSDE1 SEC63 MRPL28 DDX5 SRSF3 EIF4G1 EIF2S2 TIAL1 EIF4A2 SF1 RPS23 RPS9 VIM YY1 LRRFIP1 MRPL23
0.004262	9	898	Structural molecule activity	SPARC MRPL28 RPS23 MRPL23 RPS9 VIM CLTA EIF4G1 TPM4
0.0402671	8	1235	Protein-containing complex binding	SPARC GNAI2 TPM4 AIF1 DDX5 CLTA FCGR1A VIM
0.0309814	5	452	Actin binding	TPM4 AIF1 COTL1 LIMCH1 WASF2
0.0170508	4	195	Structural constituent of ribosome	MRPL28 RPS23 MRPL23 RPS9
0.00749868	3	58	Translation initiation factor activity	EIF4G1 EIF2S2 EIF4A2
0.0289644	3	117	Translation factor activity, RNA binding	EIF4G1 EIF2S2 EIF4A2
0.0309814	2	37	Pre-mRNA binding	DDX5 SF1
0.047101	2	59	ATP-dependent RNA helicase activity	DDX5 EIF4A2
0.047101	2	56	Peroxidase activity	PRDX2 CAT
0.047101	2	61	RNA-dependent ATPase activity	DDX5 EIF4A2
0.047101	2	61	Oxidoreductase activity, acting on peroxide as acceptor	PRDX2 CAT
0.047101	2	55	Promoter-specific chromatin binding	EGR1 DDX5
0.0479845	2	66	RNA helicase activity	DDX5 EIF4A2

## Sheet: REACTOME
Enrichment FDR	Genes in list	Total genes	Functional Category	Genes
0.00237503	13	2032	Reactome:R-HSA-168256 Immune System	CAT CLTA COTL1 EGR1 EIF4A2 EIF4G1 FBXL5 FCGR1A LRRFIP1 POLR2L TCIRG1 VIM WASF2
0.0119627	13	2690	Reactome:R-HSA-162582 Signal Transduction	CLTA DDX5 EGR1 EIF4G1 FGD3 GNAI2 PHC1 POLR2L SPOP TCIRG1 TIAL1 WASF2 YY1
0.00596872	12	2038	Reactome:R-HSA-392499 Metabolism of proteins	CAT EIF2S2 EIF4A2 EIF4G1 FBXL5 GNAI2 MRPL23 MRPL28 PHC1 RPS23 SEC63 YY1
0.00567412	7	712	Reactome:R-HSA-8953854 Metabolism of RNA	DDX5 EIF4A2 EIF4G1 POLR2L RPS23 SF1 SRSF3
0.000888046	6	297	Reactome:R-HSA-72766 Translation	EIF2S2 EIF4A2 EIF4G1 MRPL23 MRPL28 RPS23
0.0110017	5	432	Reactome:R-HSA-9006934 Signaling by Receptor Tyrosine Kinases	CLTA POLR2L TCIRG1 TIAL1 WASF2
0.0119627	5	468	Reactome:R-HSA-8953897 Cellular responses to external stimuli	ATG3 ATG4B CAT PHC1 PRDX2
0.000252287	4	60	Reactome:R-HSA-72662 Activation of the mRNA upon binding of the cap-binding complex and eIFs, and subsequent binding to 43S	EIF2S2 EIF4A2 EIF4G1 RPS23
0.000252287	4	59	Reactome:R-HSA-72702 Ribosomal scanning and start codon recognition	EIF2S2 EIF4A2 EIF4G1 RPS23
0.000252287	4	59	Reactome:R-HSA-72649 Translation initiation complex formation	EIF2S2 EIF4A2 EIF4G1 RPS23
0.00145227	4	120	Reactome:R-HSA-72737 Cap-dependent Translation Initiation	EIF2S2 EIF4A2 EIF4G1 RPS23
0.00145227	4	120	Reactome:R-HSA-72613 Eukaryotic Translation Initiation	EIF2S2 EIF4A2 EIF4G1 RPS23
0.00145227	4	113	Reactome:R-HSA-72706 GTP hydrolysis and joining of the 60S ribosomal subunit	EIF2S2 EIF4A2 EIF4G1 RPS23
0.00145227	4	112	Reactome:R-HSA-156827 L13a-mediated translational silencing of Ceruloplasmin expression	EIF2S2 EIF4A2 EIF4G1 RPS23
0.00545217	4	180	Reactome:R-HSA-72163 mRNA Splicing - Major Pathway	DDX5 POLR2L SF1 SRSF3
0.00567412	4	191	Reactome:R-HSA-72172 mRNA Splicing	DDX5 POLR2L SF1 SRSF3
0.00596872	4	198	Reactome:R-HSA-913531 Interferon Signaling	EGR1 EIF4A2 EIF4G1 FCGR1A
0.00975067	4	243	Reactome:R-HSA-72203 Processing of Capped Intron-Containing Pre-mRNA	DDX5 POLR2L SF1 SRSF3
0.0110017	3	128	Reactome:R-HSA-8939211 ESR-mediated signaling	DDX5 POLR2L YY1
0.0110017	3	122	Reactome:R-HSA-9018519 Estrogen-dependent gene expression	DDX5 POLR2L YY1
0.0129795	3	144	Reactome:R-HSA-168255 Influenza Life Cycle	CLTA POLR2L RPS23
0.0153596	3	155	Reactome:R-HSA-168254 Influenza Infection	CLTA POLR2L RPS23
0.0187889	3	171	Reactome:R-HSA-9006931 Signaling by Nuclear Receptors	DDX5 POLR2L YY1
0.00751665	2	24	Reactome:R-HSA-429947 Deadenylation of mRNA	EIF4A2 EIF4G1
0.00827558	2	26	Reactome:R-HSA-6803529 FGFR2 alternative splicing	POLR2L TIAL1
0.0110017	2	35	Reactome:R-HSA-445355 Smooth Muscle Contraction	MYL12A TPM4
0.0110017	2	34	Reactome:R-HSA-390522 Striated Muscle Contraction	TPM4 VIM
0.0116237	2	37	Reactome:R-HSA-3299685 Detoxification of Reactive Oxygen Species	CAT PRDX2
0.0186304	2	52	Reactome:R-HSA-72695 Formation of the ternary complex, and subsequently, the 43S complex	EIF2S2 RPS23
0.0193951	2	55	Reactome:R-HSA-429914 Deadenylation-dependent mRNA decay	EIF4A2 EIF4G1

## Sheet: HallMark MSigDB
Enrichment FDR	Genes in list	Total genes	Functional Category	Genes
0.00796044	4	197	MSigDB:HALLMARK MYC TARGETS V1	PGK1 SRSF3 EIF2S2 MRPL23
0.0213785	2	46	MSigDB:HALLMARK REACTIVE OXIGEN SPECIES PATHWAY	PRDX2 CAT
0.0279078	3	197	MSigDB:HALLMARK EPITHELIAL MESENCHYMAL TRANSITION	SPARC VIM TPM4

## Sheet: Curated MsigDB
Enrichment FDR	Genes in list	Total genes	Functional Category	Genes
0.00344694	13	1866	MSigDB:PILON KLF1 TARGETS DN	TMEM123 FCGR1A YY1 VIM COTL1 SRSF3 FBXL5 LRRFIP1 CLTA SPOP ATG3 DDX5 TPM4
0.00354849	12	1638	MSigDB:BLALOCK ALZHEIMERS DISEASE UP	SPARC YY1 COTL1 SEC63 LRRFIP1 SPOP ATG3 SAP30BP ATG4B WASF2 FBXL5 CSDE1
0.00737335	10	1335	MSigDB:DIAZ CHRONIC MEYLOGENOUS LEUKEMIA UP	SDHD EIF2S2 CSDE1 SEC63 PHC1 YY1 EIF4G1 SPOP SRSF3 PGK1
0.00788152	10	1386	MSigDB:PUJANA ATM PCC NETWORK	PGK1 YY1 INTS1 TMEM123 TIAL1 SRSF3 DDX5 RPS23 SF1 LRRFIP1
0.000424647	8	378	MSigDB:HSIAO HOUSEKEEPING GENES	EIF4A2 POLR2L VIM SF1 PGK1 DDX5 RPS23 CLTA
0.00110527	8	536	MSigDB:FLECHNER BIOPSY KIDNEY TRANSPLANT OK VS DONOR UP	TMEM123 DDX5 SPARC LRRFIP1 CAT PGK1 TIAL1 VIM
0.00331594	8	680	MSigDB:SCHLOSSER SERUM RESPONSE DN	TMEM123 DDX5 SDHD SEC63 CAT PGK1 MYL12A EIF2S2
0.00462951	8	776	MSigDB:MARTENS TRETINOIN RESPONSE DN	ATG3 MYL12A POLR2L EIF4A2 DDX5 VIM RPS23 CCDC85B
0.00609314	8	829	MSigDB:KRIGE RESPONSE TO TOSEDOSTAT 6HR DN	FGD3 PGK1 YY1 MRPL23 COX16 CCDC85B AIF1 ATG3
0.00788152	8	923	MSigDB:KRIGE RESPONSE TO TOSEDOSTAT 24HR DN	PGK1 EGR1 AIF1 YY1 CCDC85B COX16 ATG3 MRPL23
0.00135473	7	426	MSigDB:BAELDE DIABETIC NEPHROPATHY DN	RSBN1 VIM EIF4A2 TMEM123 AIF1 MYL12A TIAL1
0.000669056	6	223	MSigDB:THEILGAARD NEUTROPHIL AT SKIN WOUND DN	YY1 GNAI2 LST1 LRRFIP1 TIAL1 VIM
0.00350079	6	359	MSigDB:WANG TUMOR INVASIVENESS UP	DDX5 SRSF3 VIM CLTA EIF4G1 EIF2S2
0.00472064	6	411	MSigDB:SHEN SMARCA2 TARGETS UP	SEC63 SDHD RSBN1 FBXL5 ATG3 LIMCH1
0.00824157	6	529	MSigDB:WEST ADRENOCORTICAL TUMOR DN	COX16 CAT EGR1 CCDC85B DDX5 SF1
0.00118308	5	156	MSigDB:YAO TEMPORAL RESPONSE TO PROGESTERONE CLUSTER 13	MRPL23 COX16 MRPL28 PRDX2 CAT
0.00422911	5	244	MSigDB:DANG REGULATED BY MYC DN	RPS23 DDX5 CSDE1 SPARC MYL12A
0.00788018	5	305	MSigDB:RUTELLA RESPONSE TO CSF2RB AND IL4 DN	FBXL5 EGR1 AIF1 SPARC TCIRG1
0.00788152	5	327	MSigDB:WONG EMBRYONIC STEM CELL CORE	PHC1 SDHD EIF2S2 YY1 RPS23
0.00895917	5	360	MSigDB:BASAKI YBX1 TARGETS DN	SF1 EGR1 CAT TCIRG1 PGK1
0.0101759	5	378	MSigDB:BLALOCK ALZHEIMERS DISEASE INCIPIENT UP	CSDE1 SAP30BP COTL1 ATG3 SEC63
0.0109473	5	387	MSigDB:OSMAN BLADDER CANCER UP	RSBN1 YY1 EIF4G1 TPM4 LRRFIP1
0.0110752	5	390	MSigDB:RUTELLA RESPONSE TO HGF VS CSF2RB AND IL4 UP	EGR1 SPARC FBXL5 AIF1 TCIRG1
0.011342	5	396	MSigDB:REN ALVEOLAR RHABDOMYOSARCOMA DN	GNAI2 CAT CLTA TPM4 ATG3
0.011342	5	396	MSigDB:MOOTHA PGC	EIF4A2 PRDX2 TCIRG1 SF1 PGK1
0.0114386	5	405	MSigDB:BOQUEST STEM CELL CULTURED VS FRESH UP	TPM4 LIMCH1 EIF2S2 PGK1 EGR1
0.00481513	4	143	MSigDB:FLECHNER PBL KIDNEY TRANSPLANT OK VS DONOR UP	LST1 SRSF3 RPS23 SF1
0.00895917	4	206	MSigDB:LOCKWOOD AMPLIFIED IN LUNG CANCER	CAT YY1 EIF4G1 MRPL23
0.0101759	4	220	MSigDB:PHONG TNF RESPONSE VIA P38 COMPLETE	CCDC85B LIMCH1 EGR1 FBXL5
0.0114386	4	237	MSigDB:BLUM RESPONSE TO SALIRASIB UP	EGR1 VIM EIF2S2 SEC63
0.000594069	3	16	MSigDB:BIOCARTA EIF PATHWAY	EIF4G1 EIF4A2 EIF2S2
0.000594069	3	16	MSigDB:NGO MALIGNANT GLIOMA 1P LOH	TPM4 VIM PGK1
0.00135473	3	28	MSigDB:BARRIER CANCER RELAPSE NORMAL SAMPLE DN	TCIRG1 INTS1 ATG4B
0.00379082	3	47	MSigDB:KHETCHOUMIAN TRIM24 TARGETS UP	VIM SPARC EGR1
0.00444465	3	52	MSigDB:CHNG MULTIPLE MYELOMA HYPERPLOID UP	CLTA RPS23 EIF4A2
0.00788152	3	77	MSigDB:FRIDMAN SENESCENCE UP	VIM SPARC EIF2S2
0.00788152	3	80	MSigDB:SAKAI TUMOR INFILTRATING MONOCYTES DN	SEC63 FCGR1A PRDX2
0.00788152	3	85	MSigDB:FLECHNER BIOPSY KIDNEY TRANSPLANT REJECTED VS OK UP	AIF1 LST1 FCGR1A
0.00788152	3	85	MSigDB:FERRANDO T ALL WITH MLL ENL FUSION UP	DDX5 PRDX2 VIM
0.00788152	3	83	MSigDB:TAKAO RESPONSE TO UVB RADIATION UP	POLR2L PRDX2 CCDC85B
0.00788152	3	72	MSigDB:BRUECKNER TARGETS OF MIRLET7A3 DN	SPARC COTL1 VIM
0.00788152	3	75	MSigDB:MALONEY RESPONSE TO 17AAG DN	POLR2L CLTA SRSF3
0.00788152	3	84	MSigDB:LI DCP2 BOUND MRNA	MRPL23 POLR2L SAP30BP
0.00788152	3	84	MSigDB:KIM GLIS2 TARGETS UP	AIF1 SPARC VIM
0.00788152	2	19	MSigDB:AMIT EGF RESPONSE 40 MCF10A	EGR1 LRRFIP1
0.00788152	2	16	MSigDB:NIELSEN LEIOMYOSARCOMA DN	LIMCH1 PRDX2
0.00788152	2	19	MSigDB:HOLLEMAN VINCRISTINE RESISTANCE ALL DN	VIM INTS1
0.00983727	2	23	MSigDB:BIOCARTA MTOR PATHWAY	EIF4G1 EIF4A2
0.0101759	2	24	MSigDB:BIOCARTA EIF4 PATHWAY	EIF4G1 EIF4A2
0.0114386	2	28	MSigDB:TING SILENCED BY DICER	SPARC VIM

## Sheet: KEGG
Enrichment FDR	Genes in list	Total genes	Functional Category	Genes
0.0229615	3	116	Carbon metabolism	PGK1 SDHD CAT
0.0229615	3	134	Ribosome	MRPL28 MRPL23 RPS23
0.0229615	2	32	Autophagy	ATG4B ATG3
0.0278276	3	159	RNA transport	EIF4A2 EIF4G1 EIF2S2
0.0368456	3	213	Regulation of actin cytoskeleton	WASF2 MYL12A FGD3
0.0368456	3	192	Huntington disease	CLTA POLR2L SDHD
0.0368456	2	74	Bacterial invasion of epithelial cells	WASF2 CLTA
0.04778	2	91	Fc gamma R-mediated phagocytosis	WASF2 FCGR1A
